# Supplementary material for: Deglacial to postglacial history of Nares Strait, Northwest Greenland: a marine perspective
Source: Copernicus journal article supplement (doi:10.5194/cp-2018-78), 2018-07-11
Supplement: Supplementary file 1 [file cp-2018-78-supplement.pdf]

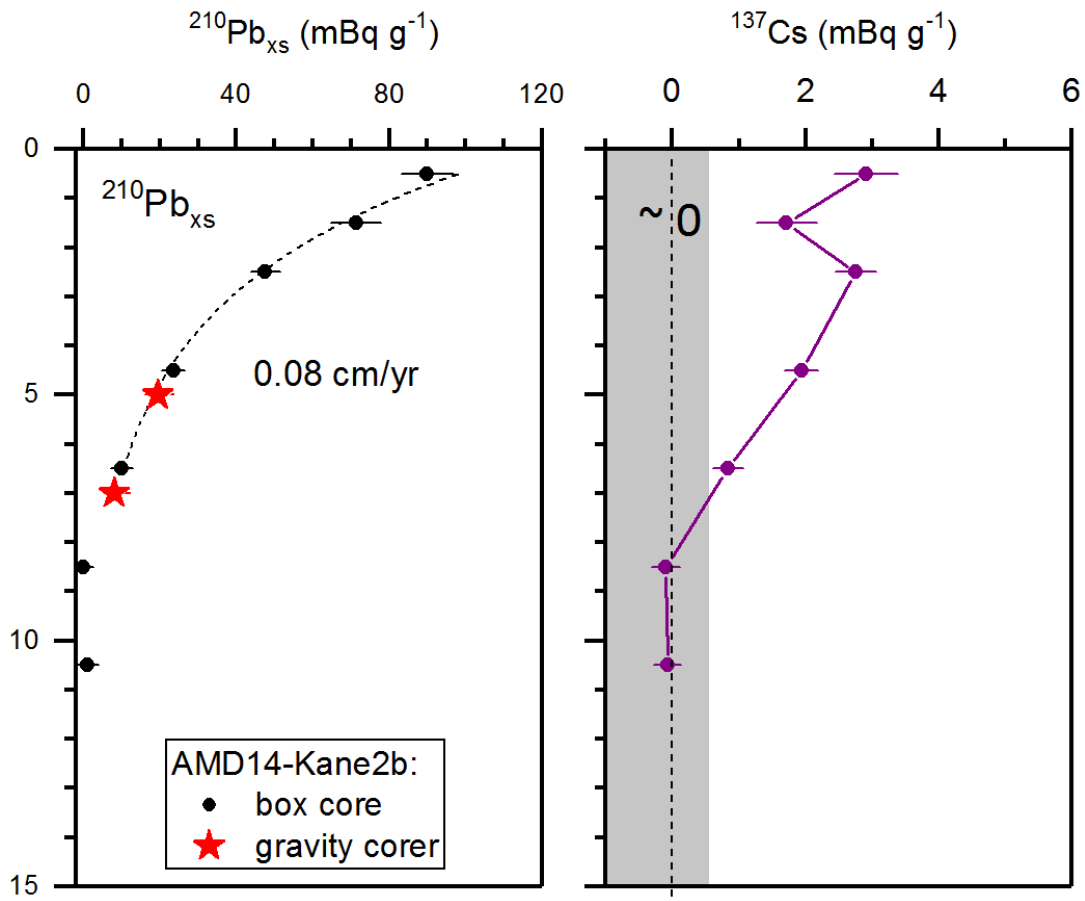

S1:  $^{210}\text{Pb}_{\text{xs}}$  and  $^{137}\text{Cs}$  profiles in AMD14-Kane2b box core (circles).  $^{210}\text{Pb}_{\text{xs}}$  data points in the top core of the AMD14-Kane2b gravity core have been shifted to obtain the best correspondence of the plots, yielding a material loss of 4 cm on the top of the gravity core.
