# Supplementary material for: Deglacial to postglacial history of Nares Strait, Northwest Greenland: a marine perspective
Source: Copernicus journal article supplement (doi:10.5194/cp-2018-78), 2018-07-11
Supplement: Supplementary file [file cp-2018-78-AC3-supplement.pdf]

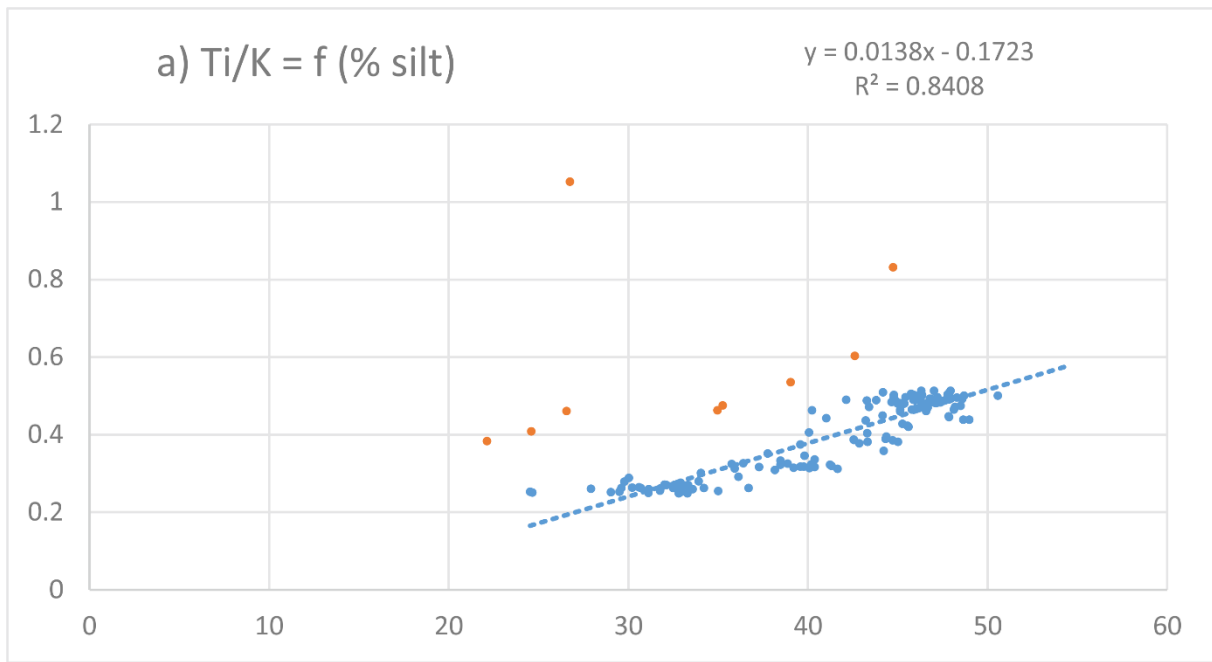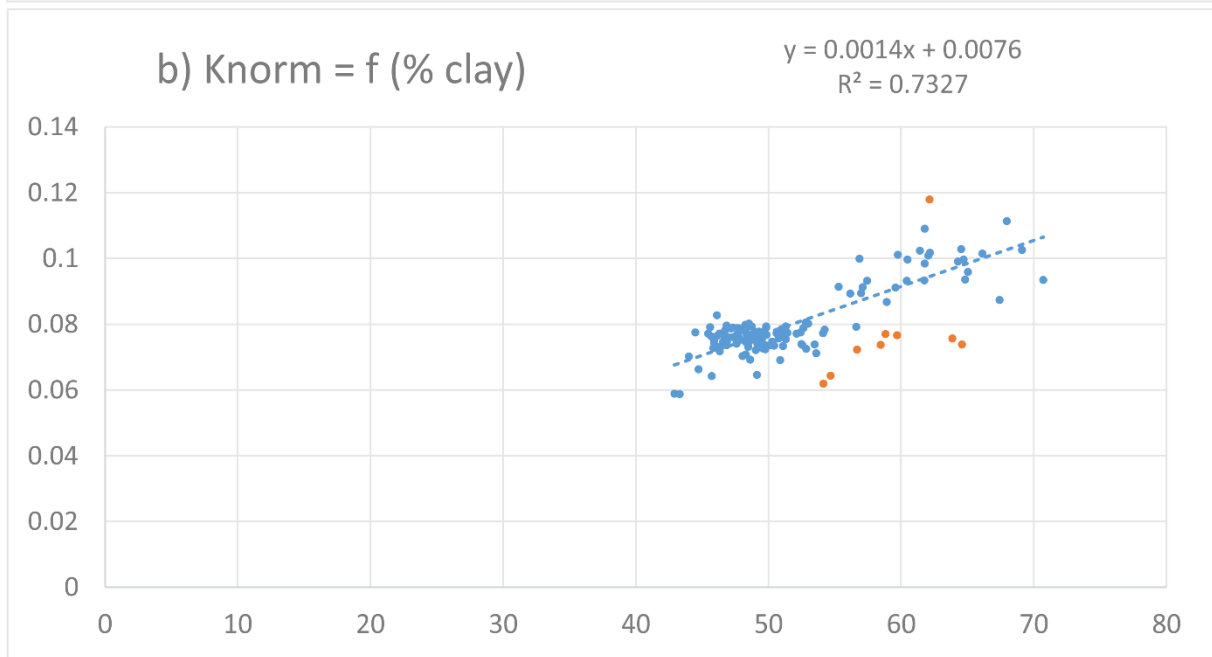

**S.1: XRF data plotted against grain size data. a)  $Ti/K = f(\% \text{ silt})$  shows a correlation factor  $r^2=0.84$  when 9 outlying data points are omitted (shown in orange). b)  $K_{norm} = f(\% \text{ clay})$  shows a correlation factor  $r^2=0.73$  when 9 outlying data points are omitted (shown in orange).**

|     | Laboratory dating number | age (yr BP) | 14C age | err  | Lat    | Long   | Median age<br>$\Delta R=240\pm 51$ | sigma1        | Original reference    |
|-----|--------------------------|-------------|---------|------|--------|--------|------------------------------------|---------------|-----------------------|
| 1   | GSC-1815                 | 10100       | 10510   | 210  | 82°27  | 62°40  | 11386                              | 11070 - 11740 | England (1977, 1983)  |
| 2   | S-1984                   | 9825        | 10235   | 460  | 82°42  | 64°45  | 10781                              | 10111 - 11378 | England (1983)        |
| 3   | GSC-3744                 | 9580        | 9990    | 140  | 82°42  | 68°15  | 10668                              | 10483 - 10867 | England (1985)        |
| 4   | S-1985                   | 9270        | 9680    | 1055 | 82°30  | 64°15  | 10358                              | 8991 - 11706  | England (1983)        |
| 5   | S-2307                   | 9070        | 9480    | 150  | 81°49  | 58°40  | 10010                              | 9807 - 10218  | England (1985)        |
| 6a  | TO-226                   | 9010        | 9420    | 150  | 78°36  | 74°45  | 9938                               | 9746 - 10159  | Blake (1992)          |
| 6b  | GSC-2516                 | 8940        | 9350    | 100  | 78°36  | 74°45  | 9854                               | 9683 - 10028  | Blake (1992)          |
| 6c  | TO-225                   | 8840        | 9250    | 50   | 78°36  | 74°45  | 9681                               | 9575 - 9759   | Blake (1992)          |
| 7   | TO-136                   | 8520        | 8930    | 80   | 81°23  | 66°53  | 9352                               | 9274 - 9450   | England (1999)        |
| 8   | SI-5551                  | 8600        | 9010    | 90   | 82°08  | 62°03  | 9431                               | 9345 - 9521   | Retelle (1986)        |
| 9   | GSC-3314                 | 8470        | 8880    | 100  | 78°43  | 74°43  | 9291                               | 9183 - 9427   | Blake (1992)          |
| 10  | DIC-737                  | 8380        | 8790    | 105  | 81°33  | 64°30  | 9187                               | 9036 - 9307   | England (1985)        |
| 11a | SI-5855                  | 8280        | 8690    | 90   | 81°35  | 60°55  | 9068                               | 8963 - 9210   | England (1985)        |
| 11b | S-2313                   | 8295        | 8705    | 120  | 81°35  | 60°54  | 9082                               | 8943 - 9270   | England (1985)        |
| 12a | S-1990                   | 8255        | 8665    | 215  | 81°53  | 63°20  | 9006                               | 8723 - 9289   | England (1985)        |
| 12b | GSC-3041                 | 8050        | 8460    | 120  | 81°53  | 63°20  | 8746                               | 8587 - 8918   | England (1985)        |
| 13a | SI-5856                  | 8230        | 8640    | 85   | 82°01  | 58°55  | 8994                               | 8858 - 9124   | England (1985)        |
| 13b | S-2309                   | 8205        | 8615    | 135  | 82°01  | 58°55  | 8946                               | 8730 - 9132   | England (1985)        |
| 14  | SI-5857                  | 8225        | 8635    | 95   | 81°18  | 61°21  | 8984                               | 8840 - 9128   | England (1985)        |
| 15  | DIC-549                  | 8200        | 8610    | 260  | 81°15  | 65°45  | 8936                               | 8604 - 9252   | England (1983)        |
| 16  | GSC-1775                 | 8130        | 8540    | 200  | 81°32  | 68°58  | 8850                               | 8573 - 9091   | England (1983)        |
| 17  | GSC-3286                 | 8060        | 8470    | 70   | 78°41  | 74°07  | 8756                               | 8626 - 8866   | Blake (1992)          |
| 18  | TO-3450                  | 8050        | 8460    | 90   | 80°10  | 71°11  | 8744                               | 8598 - 8870   | England (1996)        |
| 19  | GSC-2843                 | 7960        | 8370    | 150  | 81°04  | 66°19  | 8643                               | 8425 - 8803   | England et al. (1981) |
| 20  | TO-434                   | 7870        | 8280    | 90   | 81°03  | 66°38  | 8505                               | 8394 - 8588   | England (1996)        |
| 21  | GSC-3179                 | 7860        | 8270    | 270  | 81°41  | 69°08  | 8549                               | 8233 - 8882   | England (1983)        |
| 22a | S-2408                   | 7825        | 8235    | 130  | 81°46  | 59°08  | 8472                               | 8318 - 8604   | England (1985)        |
| 22b | GSC-3693                 | 7740        | 8150    | 90   | 81°46  | 59°08  | 8373                               | 8283 - 8474   | England (1985)        |
| 22c | S-2301                   | 7965        | 8375    | 115  | 81°46  | 59°08  | 8638                               | 8451 - 8775   | England (1985)        |
| 23  | L-1091E                  | 7800        | 8210    | 200  | ~78°38 | ~71°00 | 8461                               | 8194 - 8672   | Nichols (1969)        |
| 24  | TO-923                   | 7780        | 8190    | 70   | ~78°39 | 71°01  | 8413                               | 8342 - 8484   | Blake et al. (1992)   |

|     |            |      |      |     |         |         |      |             |                            |
|-----|------------|------|------|-----|---------|---------|------|-------------|----------------------------|
| 25  | TO-4192    | 7770 | 8180 | 70  | 79°30   | 74°59   | 8403 | 8332 - 8474 | England (1996)             |
| 26  | S-2109     | 7755 | 8165 | 125 | 81°40   | 65°20   | 8391 | 8266 - 8535 | England (1983)             |
| 27  | GSC-3710   | 7730 | 8140 | 120 | 79°04   | 75°30   | 8363 | 8233 - 8492 | Blake (1987)               |
| 28a | TO-3778    | 7650 | 8060 | 60  | 80°30   | 70°43   | 8284 | 8218 - 8348 | England (1996)             |
| 28b | TO-3464    | 7630 | 8040 | 60  | 80°30   | 70°43   | 8266 | 8199 - 8328 | England (1996)             |
| 29  | TO-3766    | 7540 | 7950 | 70  | 80°13   | 70°08   | 8176 | 8100 - 8278 | England (1996)             |
| 30  | TO-2919    | 7490 | 7900 | 60  | 80°47   | 67°55   | 8116 | 8032 - 8177 | England (1996)             |
| 31  | TO-4210    | 7480 | 7890 | 60  | 79°45   | 71°22   | 8106 | 8028 - 8168 | Gualtieri and England 1977 |
| 32  | S-2139     | 7385 | 7795 | 375 | 81°41   | 66°21   | 8042 | 7636 - 8389 | England (1983)             |
| 33  | TO-3765    | 7400 | 7810 | 70  | 80°37   | 69°15   | 8035 | 7955 - 8107 | England (1996)             |
| 34a | TO-2922    | 7340 | 7750 | 70  | 80°42   | 68°29   | 7971 | 7892 - 8046 | England (1996)             |
| 34b | TO-2925    | 7620 | 8030 | 600 | 80°42   | 68°29   | 8337 | 7664 - 8977 | England (1996)             |
| 35a | TO-4200    | 7370 | 7780 | 70  | 79°53   | 71°34   | 8001 | 7925 - 8078 | England (1996)             |
| 35b | GSC-5668   | 7320 | 7730 | 80  | 79°54   | 71°30   | 7950 | 7855 - 8025 | England (1996)             |
| 36  | TO-4214    | 7430 | 7840 | 70  | 79°49   | 71°07   | 8061 | 7987 - 8138 | Gualtieri and England 1977 |
| 37  | TO-4211    | 7390 | 7800 | 70  | 79°41   | 72°17   | 8022 | 7946 - 8098 | Gualtieri and England 1977 |
| 38  | TO-4198    | 7310 | 7720 | 70  | 80°10   | 71°28   | 7939 | 7859 - 8005 | England (1996)             |
| 39  | GSC-3700   | 7300 | 7710 | 140 | 79°06   | 76°05   | 7931 | 7782 - 8079 | Blake (1988)               |
| 40  | TO-4191    | 7190 | 7600 | 70  | 79°53   | 74°15   | 7822 | 7755 - 7909 | England (1996)             |
| 41  | S-2110     | 6995 | 7405 | 130 | 81°47   | 67°37   | 7643 | 7517 - 7764 | England (1983)             |
| 42  | SI-3300    | 6860 | 7270 | 70  | 81°17   | 69°25   | 7518 | 7454 - 7573 | England (1983)             |
| 43  | GSC-5670   | 6650 | 7060 | 190 | 80°04   | 72°19   | 7322 | 7151 - 7517 | England (1996)             |
| 44  | TO-3467    | 6500 | 6910 | 70  | 80°32   | 70°43   | 7199 | 7132 - 7284 | England (1996)             |
| 45  | TO-2918    | 6490 | 6900 | 90  | 80°55   | 67°54   | 7184 | 7082 - 7291 | England (1996)             |
| 46  | GSC-1614   | 6430 |      | 150 | 81°11   | 70°17   |      | Driftwood   | England (1977, 1983)       |
| 47  | GSC-2370   | 6400 | 6810 | 100 | 79°54   | 63°58   | 7079 | 6966 - 7202 | Blake (1987)               |
| 48  | GSC-2334   | 5980 | 6390 | 70  | 81°04   | 63°35   | 6582 | 6490 - 6661 | Blake (1987)               |
| 49  | GSC-1755   | 6000 |      | 150 | 81°04   | 70°00   |      | Driftwood   | England (1977, 1983)       |
| 50a | Beta-91863 | 5920 | 6330 | 60  | 79°09   | 78°13   | 6517 | 6442 - 6594 | England (1999)             |
| 50b | GSC-6088   | 5940 | 6350 | 90  | 79°09   | 78°13   | 6350 | 6433 - 6640 | England (1999)             |
| 51  | AAR-5768   | 8820 | 75   | 25  | 81°10.6 | 63°20.5 | 9225 | 9409 - 9539 | Bennike 2002               |
| 52  | AAR-5769   | 8010 | 75   | 25  | 81°10.1 | 63°04.9 | 8237 | 8389 - 8539 | Bennike 2002               |
| 53  | AAR-5766   | 6870 | 50   | 24  | 79°55.5 | 64°04.3 | 7162 | 7328 - 7427 | Bennike 2002               |

|    |          |      |    |    |          |          |      |             |              |
|----|----------|------|----|----|----------|----------|------|-------------|--------------|
| 54 | AAR-5762 | 7240 | 65 | 23 | 79°56.5  | 64°17.1  | 7495 | 7636 - 7775 | Bennike 2002 |
| 55 | AAR-5755 | 6410 | 55 | 22 | 80°05.8  | 64°39.4  | 6605 | 6810 - 6961 | Bennike 2002 |
| 56 | AAR-5758 | 7090 | 80 | 21 | 80°24.0  | 66°58.2  | 7364 | 7496 - 7640 | Bennike 2002 |
| 57 | AAR-5757 | 7570 | 65 | 20 | 80°12.6  | 67°11.9  | 7793 | 7957 - 8102 | Bennike 2002 |
| 58 | AAR-5761 | 6890 | 60 | 19 | 80°21.5  | 67°18.7  | 7181 | 7338 - 7458 | Bennike 2002 |
| 59 | AAR-5760 | 7580 | 55 | 18 | 80°18.7  | 67°23.6  | 7803 | 7972 - 8103 | Bennike 2002 |
| 60 | AAR-5755 | 5165 | 55 | 19 | 80°08.8' | 64°20.2' | 5255 | 5470 - 5578 | Bennike 2002 |
| 64 | AAR-5772 | 1400 | 60 | 6  | 80°33.1' | 67°11.1' | 712  | 892 - 1027  | Bennike 2002 |
| 61 | K-7142   | 1310 | 35 | 15 | 80°09.4' | 63°39.6' | 638  | 609 - 672   | Bennike 2002 |
| 62 | K-7138   | 2170 | 55 | 38 | 80°23.9' | 65°18.1' | 1477 | 1693 - 1834 | Bennike 2002 |
| 63 | AAR-5531 | 2070 | 55 | 39 | 80°24.9' | 64°20.0' | 1376 | 1563 - 1706 | Bennike 2002 |

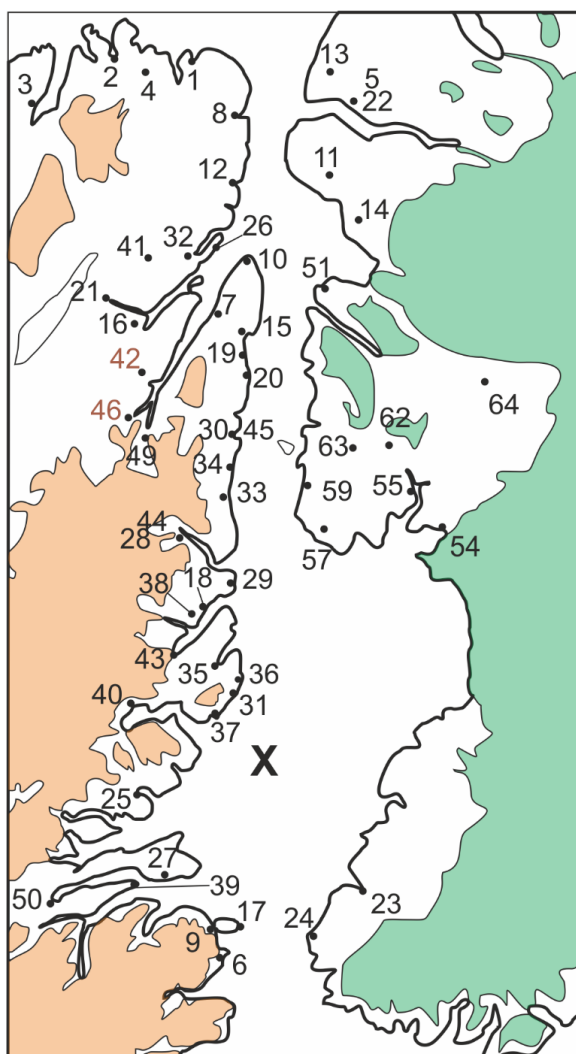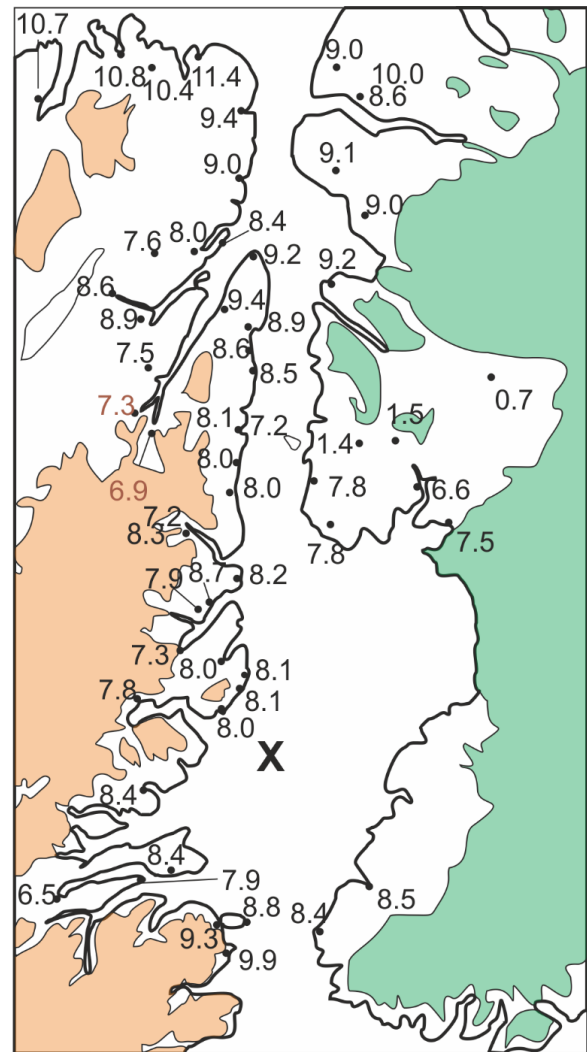

S.2: radiocarbon ages as reported in England (1999) and Bennike (2002) and calibrated with  $\Delta R=240 \pm 51$  years and their location in Nares Strait.

S.3: radiocarbon ages from Jennings et al. (2011) calibrated with  $\Delta R=240$

| Depth in core (cm) | Laboratory number | 14C age      | Material dated            | Median age ( $\Delta R=240$ ) | $1\sigma \Delta R=240$ |
|--------------------|-------------------|--------------|---------------------------|-------------------------------|------------------------|
| 0-2                | AA-81309          | 530 $\pm$ 53 | <i>Bathyrca glacialis</i> | ~290                          |                        |

|         |            |          |                              |      |             |
|---------|------------|----------|------------------------------|------|-------------|
| 8-10    | NOS -71686 | 3100 ±35 | NPS                          | 2636 | 2595 - 2709 |
| 28-30   | NOS -71687 | 5040 ±40 | NPS                          | 5087 | 5010 - 5140 |
| 58-60   | NOS -71688 | 6870 ±45 | NPS                          | 7164 | 7120 - 7234 |
| 68-70   | AA-81310   | 7302 ±61 | NPS                          | 7543 | 7484 - 7596 |
| 69-98   | NOS -72574 | 8290 ±50 | NPS                          | 8502 | 8439 - 8558 |
| 345-349 | NOS -71689 | 9320 ±45 | NPS and <i>C. neoteretis</i> | 9794 | 9702 - 9882 |
